# Supplementary material for: Low-cost and multi-level structured NiFeMn alloy@NiFeMn oxyhydroxide electrocatalysts for highly efficient overall water splitting
Source: Royal Society of Chemistry journal article supplement (doi:10.1039/d1qi00215e), 2021-01-01
Supplement: d1qi00215e1.pdf [file d1qi00215e1.pdf]

# **Low-cost and Multi-level Structured NiFeMn Alloy@NiFeMn Oxyhydroxide Electrocatalysts for Highly-efficient Overall Water Splitting**

Zeyu Ge,<sup>ab</sup> Fei Wang,<sup>a</sup> Junji Guo,<sup>a</sup> Jungang Ma,<sup>ab</sup> Chunyan Yu,<sup>c</sup> Aihua Zhong,<sup>ac</sup> and Yizhu Xie<sup>\*ac</sup>

<sup>a</sup> *Shenzhen Key Laboratory of Advanced Thin Films and Applications, College of Physics and Optoelectronic engineering, Shenzhen University, Shenzhen, 518060, China. Email: yzxie@szu.edu.cn*

<sup>b</sup> *College of Materials Science and Engineering, Shenzhen University, Shenzhen, 518060, China;*

<sup>c</sup> *Key Laboratory of Optoelectronic Devices and Systems of Ministry of Education and Guangdong Province, College of Physics and Optoelectronic Engineering, Shenzhen University, Shenzhen 518060, China*

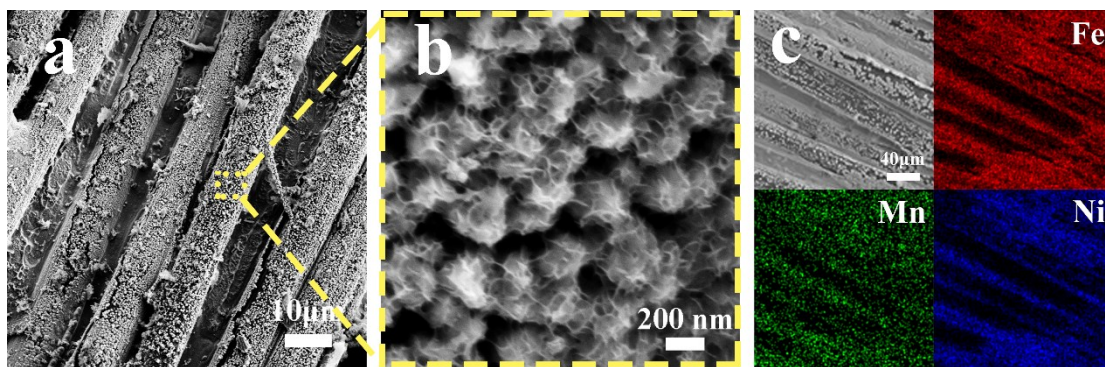

**Fig. S1** (a, b) SEM images of the NiFeMn-AOs on carbon cloth. (c) EDX elemental mapping images from SEM.

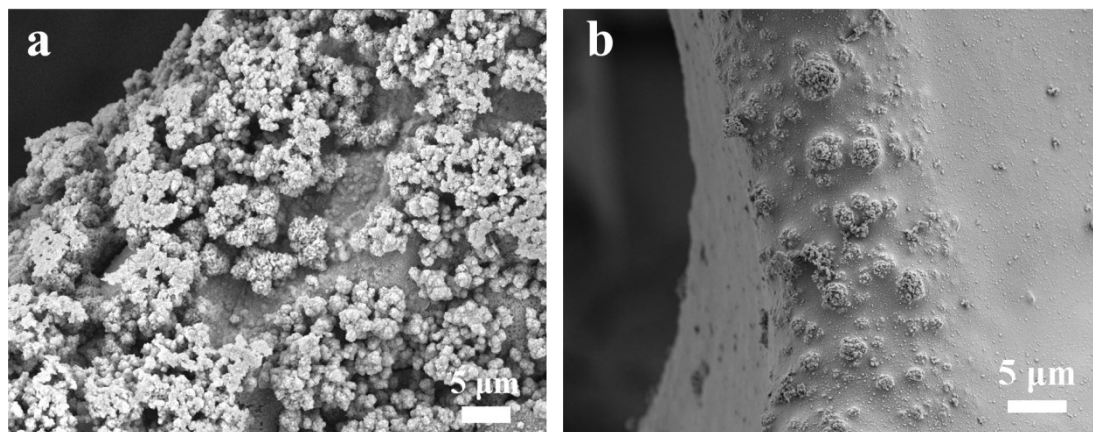

**Fig. S2** (a) surface geometry of the NiFeMn-AOs from SEM (b) surface geometry of the NiFe-AOs from SEM.

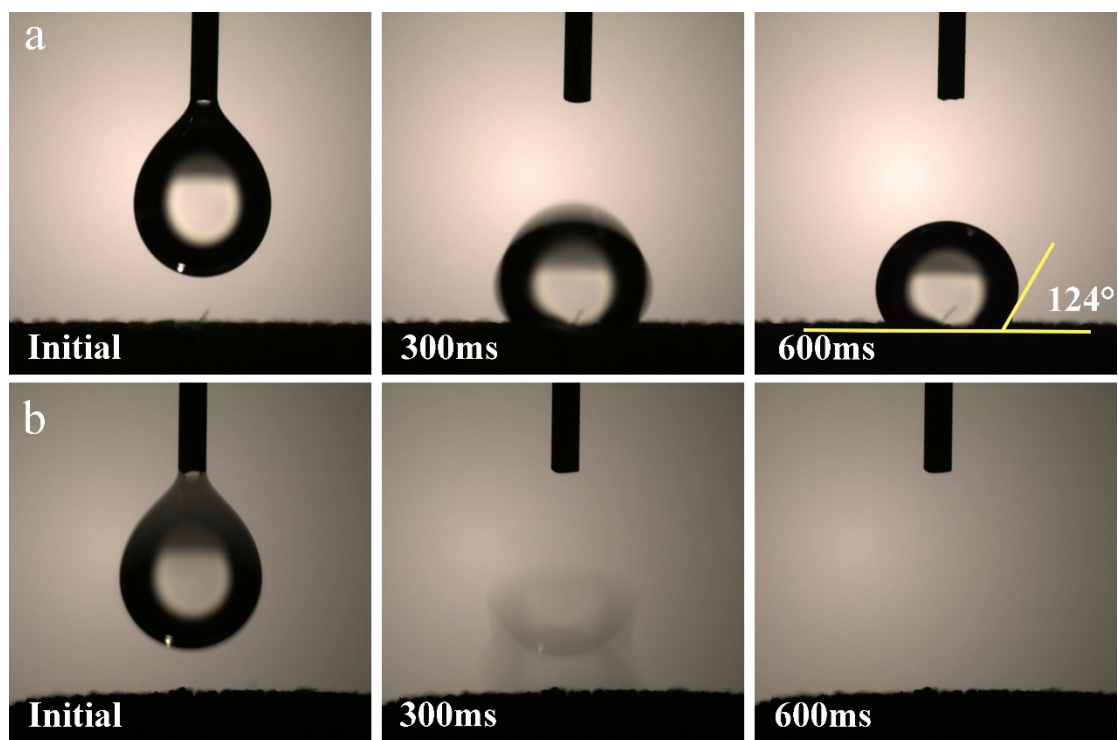

**Fig. S3** Contact angle measurements of a droplet (1 M KOH electrolyte) placed on the surface of (a) commercial nickel foam and (b) NiFeMn-AOs to investigate the wettability between the electrolyte and the catalyst surface.

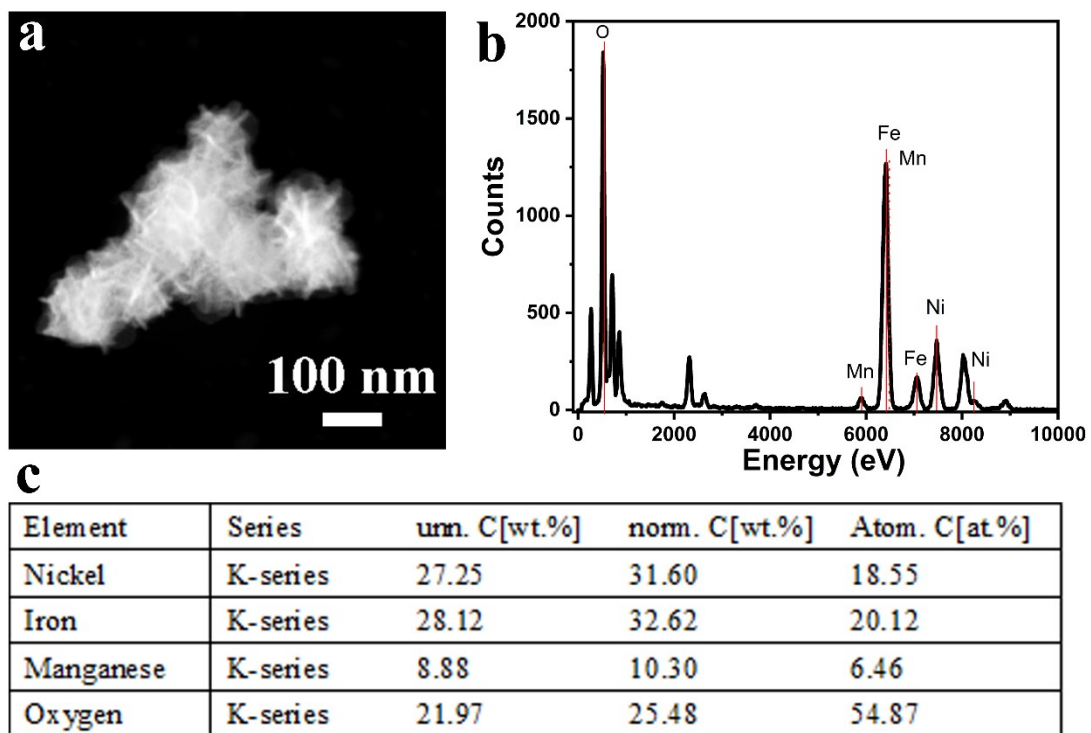

**Fig. S4** (a, b) HAADF-STEM image and the corresponding elemental selected area of Mn, Ni, Fe, and O in NiFeMn-AOs. (c) EDX element selected area from SEM.

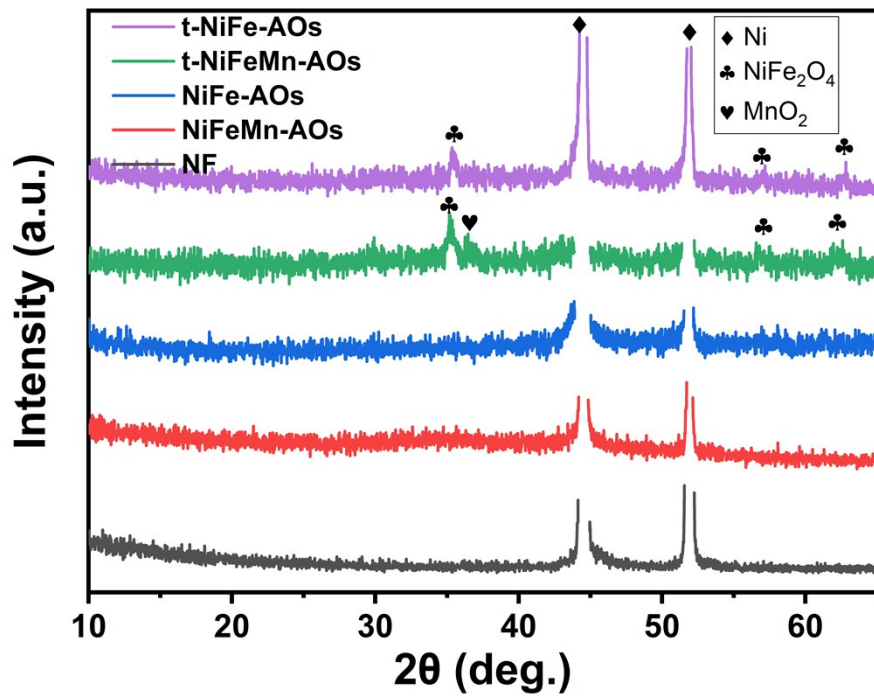

**Fig. S5** XRD Pattern of nickel foam (NF), NiFe-AOs, NiFeMn-AOs, t-NiFe-AOs (after annealing) and t-NiFeMn-AOs (after annealing).

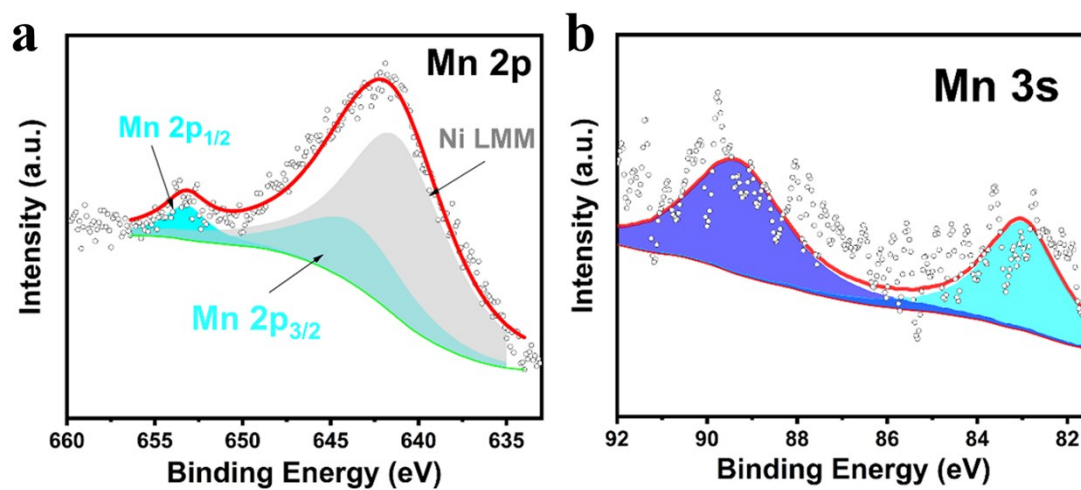

Fig. S6 (a) XPS high-resolution scans of Mn 2p, (b) XPS high-resolution scans of Mn 3s.

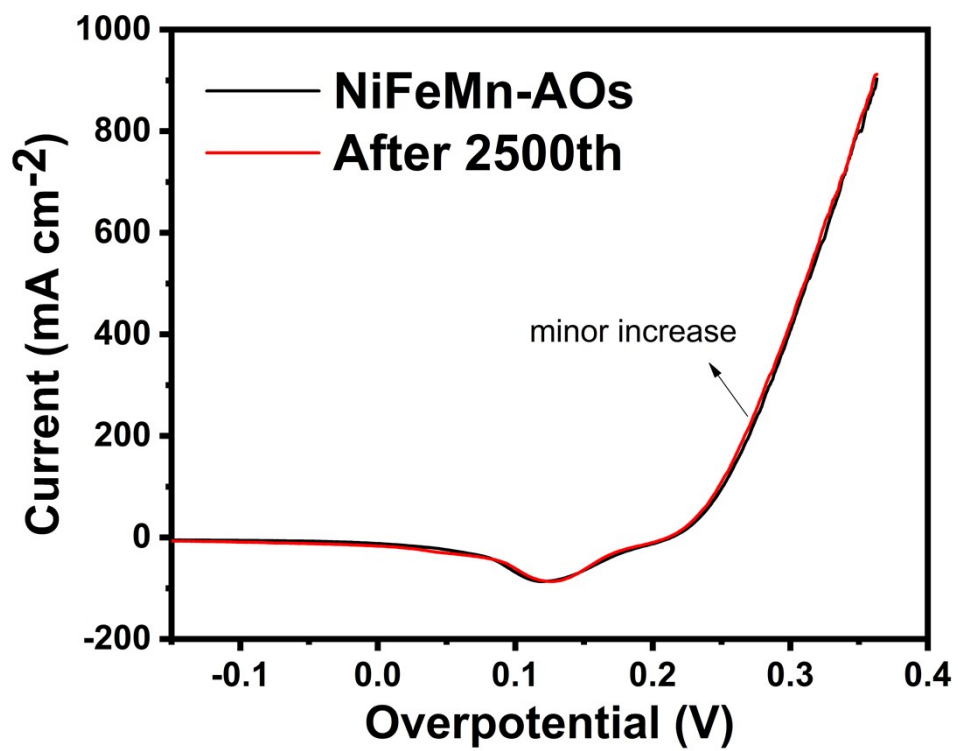

Fig. S7 Polarization data for NiFeMn-AOs before and after 2500th CV cycles.



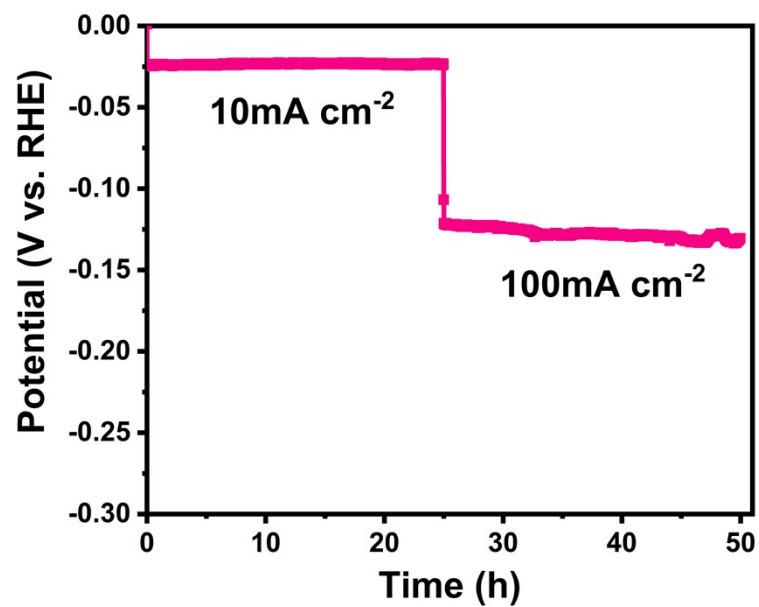

**Fig. S8** Long-term HER performance stability of NiFeMn-AOs over 50 h by chronopotentiometry test.

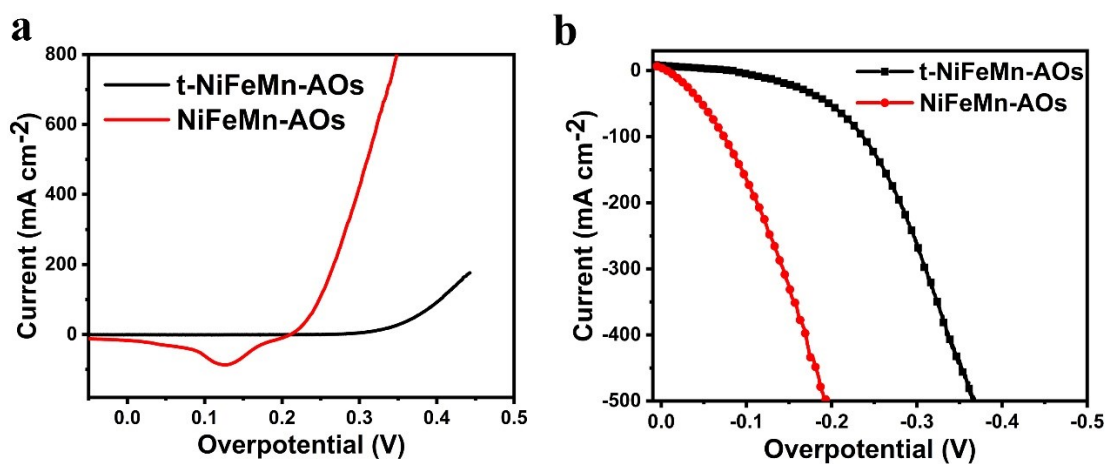

**Fig. S9** (a) Comparison of OER performance of NiFeMn-AOs performance before and after annealing at 500°C. (b) Comparison of HER performance of NiFeMn-AOs performance before and after annealing at 500°C.

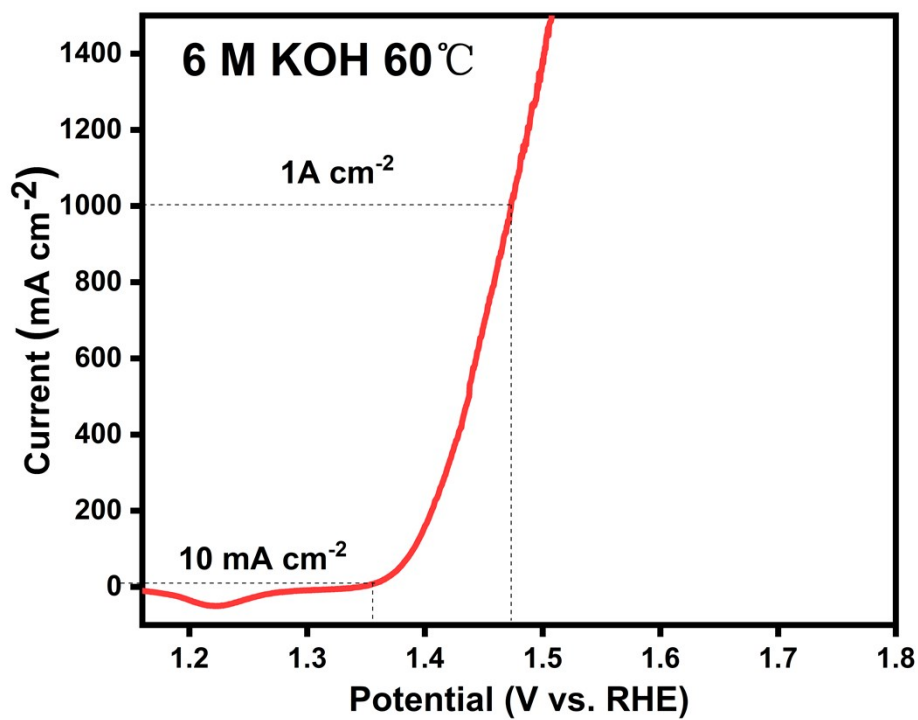

Fig. S10 OER polarization curve of NiFeMn-AOs in 6 M KOH at 60°C.

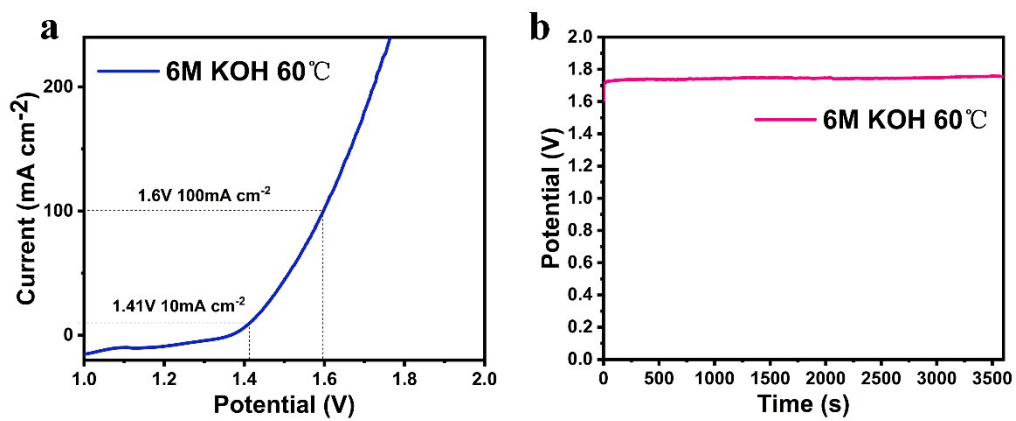

**Fig. S11** (a) The polarization curves of NiFeMn-AOs// NiFeMn-AOs electrolyzer in 6 M KOH at 60°C (without iR-compensation). (b) Chronopotentiometry curves of NiFeMn-AOs in a 6 M KOH electrolyte at 60°C.

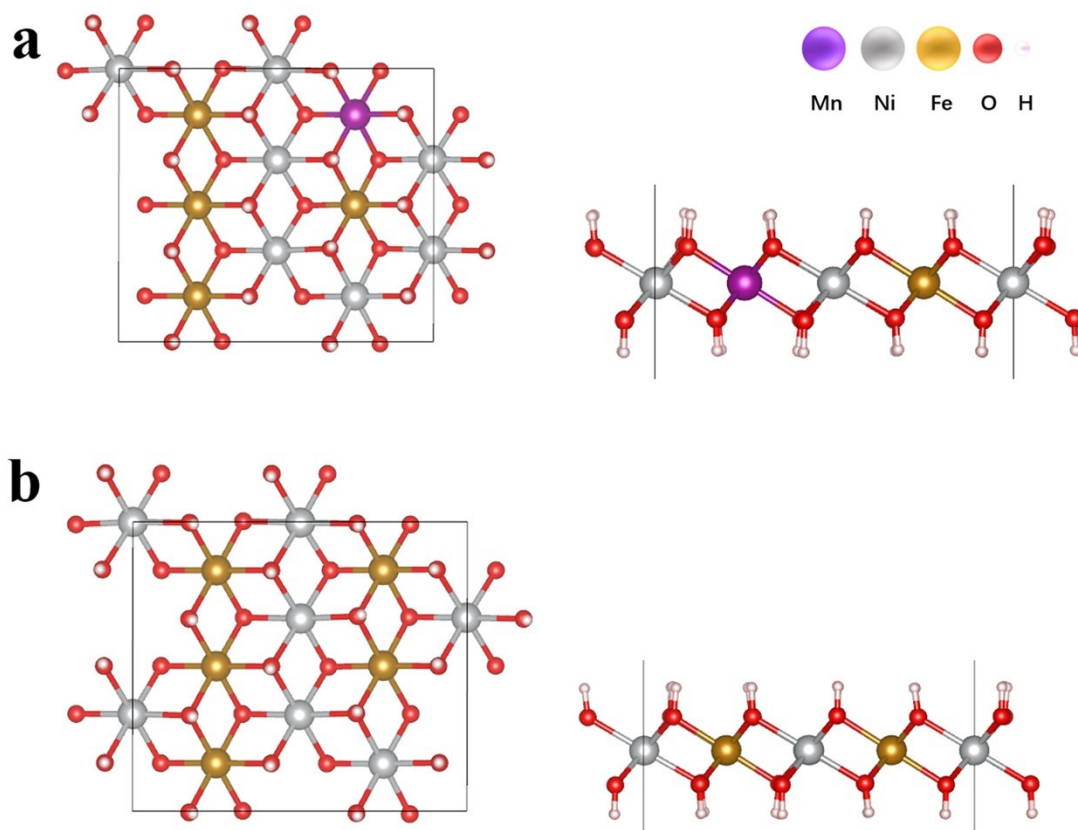

Fig. S12 Surface model of (a) NiFeMn-AOs and (b) NiFe-AOs.

**Table S1.** The alkaline OER activities of the NiFeMn-AOs and the reported non-noble based electrocatalysts

| <b>Electrocatalysts</b>                                   | <b>Overpotential at<br/>10 mA cm<sup>-2</sup></b> | <b>Tafel slope<br/>(mV dec<sup>-1</sup>)</b> | <b>Reference</b>                                                      |
|-----------------------------------------------------------|---------------------------------------------------|----------------------------------------------|-----------------------------------------------------------------------|
| NiFe/NiFe-OH                                              | 222 mV                                            | 41                                           | <i>Appl. Catal. B: Environ.</i> <b>2019</b> ,<br>257, 117899          |
| Ni <sub>60</sub> Fe <sub>30</sub> Mn <sub>10</sub> -alloy | 200 mV                                            | 62                                           | <i>Energy Environ. Sci.</i> <b>2016</b> , <i>9</i> ,<br>540           |
| Ni@NiFe LDH                                               | 218 mV                                            | 66                                           | <i>J. Mater. Chem. A.</i> <b>2019</b> , <i>7</i> ,<br>21722           |
| FeOOH(Se)                                                 | 221 mV                                            | 54                                           | <i>J. Am. Chem. Soc.</i> <b>2019</b> , <i>141</i> ,<br>7005           |
| Ni <sub>3</sub> Se <sub>4</sub> @NiFe LDH                 | 223 mV                                            | 55                                           | <i>Nanoscale Horiz.</i> <b>2019</b> , <i>4</i> , 1132                 |
| CoFe@NiFe/NF                                              | 190 mV                                            | 46                                           | <i>Appl. Catal. B.</i> <b>2019</b> , 253, 131                         |
| NiFe LDH/NiFe <sub>2</sub> O <sub>4</sub>                 | 202 mV                                            | 47                                           | <i>ACS Appl. Mater. Interfaces</i><br><b>2018</b> , <i>10</i> , 26283 |
| CoFeZr oxides                                             | 248 mV                                            | 54                                           | <i>Adv. Mater.</i> <b>2019</b> , <i>31</i> , 1901439                  |
| NiFeMoO <sub>x</sub>                                      | 255 mV                                            | 35                                           | <i>Adv. Sci.</i> <b>2020</b> , <i>7</i> , 1902034                     |
| CuO <sub>x</sub> @NiMnO <sub>x</sub>                      | 225 mV                                            | 80                                           | <i>J. Mater. Chem. A.</i> <b>2020</b> , <i>8</i> ,<br>16463           |
| NiFeMn-AOs                                                | 220 mV                                            | 26                                           | (This work)                                                           |

**Table S2.** The alkaline HER activities of the NiFeMn-AOs and the reported non-noble based Electrocatalysts.

| <b>Electrocatalysts</b>                   | <b>Overpotential at<br/>10 mA cm<sup>-2</sup></b> | <b>Tafel slope<br/>(mV dec<sup>-1</sup>)</b> | <b>Reference</b>                                           |
|-------------------------------------------|---------------------------------------------------|----------------------------------------------|------------------------------------------------------------|
| Ni@NCNT/NiMoN/NF                          | 15 mV                                             | 68                                           | <i>J. Mater. Chem. A</i> , <b>2019</b> , 7, 13671          |
| Ni@NiFe LDH                               | 92 mV                                             | 72                                           | <i>J. Mater. Chem. A</i> , <b>2019</b> , 7, 21722          |
| NiFe LDH@Ni <sub>3</sub> N                | 30 mV                                             | 79                                           | <i>J. Mater. Chem. A</i> <b>2020</b> , 33, 17202           |
| Ni <sub>3</sub> Se <sub>4</sub> @NiFe LDH | 85 mV                                             | 98.6                                         | <i>Nanoscale Horiz.</i> <b>2019</b> , 4, 1132              |
| CoFe@NiFe/NF                              | 240 mV                                            | 88.9                                         | <i>Appl. Catal. B: Environ.</i> <b>2019</b> , 253, 131     |
| NiFe LDH/NiFe <sub>2</sub> O <sub>4</sub> | 101 mV                                            | 67.1                                         | <i>ACS Appl. Mater. Interfaces</i> <b>2018</b> , 10, 26283 |
| CoFeZr oxides                             | 104 mV                                            | 119                                          | <i>Adv. Mater.</i> <b>2019</b> , 31, 1901439               |
| NiFeMoO <sub>x</sub>                      | 22 mV                                             | 76                                           | <i>Adv. Sci.</i> <b>2020</b> , 7, 1902034                  |
| CuO <sub>x</sub> @NiMnO <sub>x</sub>      | 71.6 mV                                           | 63                                           | <i>J. Mater. Chem. A</i> <b>2020</b> , 8, 16463            |
| NiFeMn-AOs                                | 19 mV                                             | 45                                           | (This work)                                                |

**Table S3.** The alkaline water splitting activities of NiFeMn-AOs//NiFeMn-AOs coupled electrolyzer and the reported electrolyzer

| <b>Electrocatalysts</b>                   | <b>Overpotential at<br/>10 mA cm<sup>-2</sup></b> | <b>Overpotential at<br/>100 mA cm<sup>-2</sup></b> | <b>Reference</b>                                                  |
|-------------------------------------------|---------------------------------------------------|----------------------------------------------------|-------------------------------------------------------------------|
| NiS <sub>0.5</sub> Se <sub>0.5</sub>      | 1.55 V                                            | 1.73 V                                             | <i>Adv. Mater.</i> <b>2020</b> ,<br>2000231                       |
| Ni/Mo <sub>2</sub> C                      | 1.57 V                                            | >1.8 V                                             | <i>Adv. Energy Mater.</i> <b>2019</b> ,<br>9, 1803185             |
| Ni@NiFe LDH                               | 1.56 V                                            | 1.61 V (with iR<br>compensation )                  | <i>J. Mater. Chem. A.</i> <b>2019</b> ,<br>7, 21722               |
| CuCo <sub>2</sub> S <sub>4</sub>          | 1.61 V (20 mA cm <sup>-2</sup> )                  | >1.8 V                                             | <i>J. Mater. Chem. A.</i> <b>2020</b> ,<br>8, 1799                |
| Ni <sub>3</sub> Se <sub>4</sub> @NiFe LDH | 1.54 V                                            | 1.75 V                                             | <i>Nanoscale Horiz.</i> <b>2019</b> , 4,<br>1132                  |
| CoFe@NiFe/NF                              | 1.59 V                                            | >1.8 V                                             | <i>Appl. Catal. B.</i> <b>2019</b> , 253,<br>131                  |
| NiFe LDH/NiFe <sub>2</sub> O <sub>4</sub> | 1.53 V                                            | 1.74 V                                             | <i>ACS Appl. Mater.<br/>Interfaces</i> <b>2018</b> , 10,<br>26283 |
| CoFeZr oxides                             | 1.63 V                                            | 1.78 V                                             | <i>Adv. Mater.</i> <b>2019</b> , 31,<br>1901439                   |
| NiFeMoO <sub>x</sub>                      | 1.50 V                                            | 1.63 V                                             | <i>Adv. Sci.</i> <b>2020</b> , 7,<br>1902034                      |
| CuO <sub>x</sub> @NiMnO <sub>x</sub>      | 1.62 V                                            | 1.82 V                                             | <i>J. Mater. Chem. A.</i> <b>2020</b> ,<br>8, 16463               |
| NiFeMn-AOs                                | 1.46 V (15 mA cm <sup>-2</sup> )                  | 1.63 V                                             | (This work)                                                       |
